# Supplementary material for: Investigation of Antigen-Specific T-Cell Receptor Clusters in Human Cancers
Source: Oxford University Press journal article supplement (doi:10.1158/1078-0432.ccr-19-3249), 2019-12-12
Supplement: 10780432ccr193249-sup-230115_1_supp_5899178_q0xx35.docx [file 10780432ccr193249-sup-230115_1_supp_5899178_q0xx35.docx]

**Table S2**. Three common HLA alleles predicted by NetMHC with strong binding affinities to a HSFX1 derived 9-mer peptide (**HSFX1: 384-392**).

| **Peptide** | **HLA allele** | **Rank** | **Binder** |
| --- | --- | --- | --- |
| VMFPHLPAL | A*02:01 | 0.02 | SB |
| VMFPHLPAL | C*07:01 | 0.25 | SB |
| VMFPHLPAL | C*07:02 | 0.125 | SB |
