# Supplementary material for: Investigation of Antigen-Specific T-Cell Receptor Clusters in Human Cancers
Source: Oxford University Press journal article supplement (doi:10.1158/1078-0432.ccr-19-3249), 2019-12-12
Supplement: 10780432ccr193249-sup-230115_1_supp_5899179_q0xr35.docx [file 10780432ccr193249-sup-230115_1_supp_5899179_q0xr35.docx]

**Table S3**. HLA genotype information for the 9 individuals with HSFX1 expression.

| **Sample** | **Disease** | **TPM** | **HLA-A1** | **HLA-A2** | **HLA-B1** | **HLA-B2** | **HLA-C1** | **HLA-C2** |
| --- | --- | --- | --- | --- | --- | --- | --- | --- |
| TCGA-AA-3502 | COAD | 0.28 | A*02:01 | A*25:01 | B*44:02 | B*51:01 | C*07:04 | C*16:02 |
| TCGA-AP-A1DM | UCEC | 1.00 | A*03:01 | A*01:01 | B*08:01 | B*35:01 | C*07:01 | C*04:01 |
| TCGA-AA-A01K | COAD | 0.83 | A*01:01 | A*03:01 | B*07:02 | B*51:01 | C*07:02 | C*12:02 |
| TCGA-AA-3684 | COAD | 1.10 | A*02:01 | A*24:02 | B*44:05 | B*52:01 | C*02:02 | C*12:02 |
| TCGA-D1-A17F | UCEC | 1.79 | A*02:01 | A*02:01 | B*15:01 | B*51:01 | C*01:02 | C*03:04 |
| TCGA-AA-3875 | COAD | 0.72 | A*01:01 | A*68:01 | B*08:01 | B*15:01 | C*03:03 | C*07:01 |
| TCGA-AA-3848 | COAD | 3.05 | A*02:01 | A*29:02 | B*41:02 | B*44:03 | C*16:01 | C*17:01 |
| TCGA-BG-A0MT | UCEC | 0.70 | A*02:01 | A*02:01 | B*44:02 | B*50:01 | C*05:01 | C*06:02 |
| TCGA-BG-A18C | UCEC | 4.49 | A*03:01 | A*24:02 | B*07:02 | B*07:02 | C*07:02 | C*07:02 |
