# Supplementary material for: Investigation of Antigen-Specific T-Cell Receptor Clusters in Human Cancers
Source: Oxford University Press journal article supplement (doi:10.1158/1078-0432.ccr-19-3249), 2019-12-12
Supplement: 10780432ccr193249-sup-230115_1_supp_5899180_q0x635.docx [file 10780432ccr193249-sup-230115_1_supp_5899180_q0x635.docx]

**Table S4**. NetMHC predicted binding peptide information for TSSK2.

| **Peptide** | **HLA allele** | **Rank** | **Predicted binder** |
| --- | --- | --- | --- |
| GRIYIIMEL | B*27:02 | 0.014 | SB |
| GRIYIIMEL | C*07:02 | 0.056 | SB |
| GRIYIIMEL | C*07:04 | 0.073 | SB |
| GRIYIIMEL | C*07:06 | 0.038 | SB |
