# Supplementary material for: Investigation of Antigen-Specific T-Cell Receptor Clusters in Human Cancers
Source: Oxford University Press journal article supplement (doi:10.1158/1078-0432.ccr-19-3249), 2019-12-12
Supplement: 10780432ccr193249-sup-230115_1_supp_5899181_q0xp35.docx [file 10780432ccr193249-sup-230115_1_supp_5899181_q0xp35.docx]

**Table S5**. HLA genotypes information for samples with TSSK2 expression.

| **Sample** | **Cancer** | **HLA-A1** | **HLA-A2** | **HLA-B1** | **HLA-B2** | **HLA-C1** | **HLA-C2** |
| --- | --- | --- | --- | --- | --- | --- | --- |
| TCGA-BR-8678 | STAD | A*11:01 | A*66:01 | B*55:01 | B*44:02 | C*07:04 | C*01:02 |
| TCGA-BR-A4IZ | STAD | A*11:01 | A*33:03 | B*48:01 | B*44:03 | C*07:06 | C*08:01 |
| TCGA-D7-8572 | STAD | A*68:01 | A*29:02 | B*27:02 | B*44:03 | C*16:01 | C*02:02 |
| TCGA-BR-4267 | STAD | A*02:01 | A*02:01 | B*07:02 | B*07:02 | C*07:02 | C*07:02 |
| TCGA-BR-8484 | STAD | A*03:01 | A*02:01 | B*07:02 | B*40:01 | C*07:02 | C*03:04 |
